# Supplementary material
Source: Royal Society of Chemistry journal article supplement (doi:10.1039/d6nj01139j)
Supplement: d6nj01139j1.pdf [file d6nj01139j1.pdf]

### Supplementary Information File

Flexible KNN-BT-Poly(vinylidene fluoride) Composites: Synergistic Effect on Ferroelectric Properties and Capacitive Pressure Sensing Response

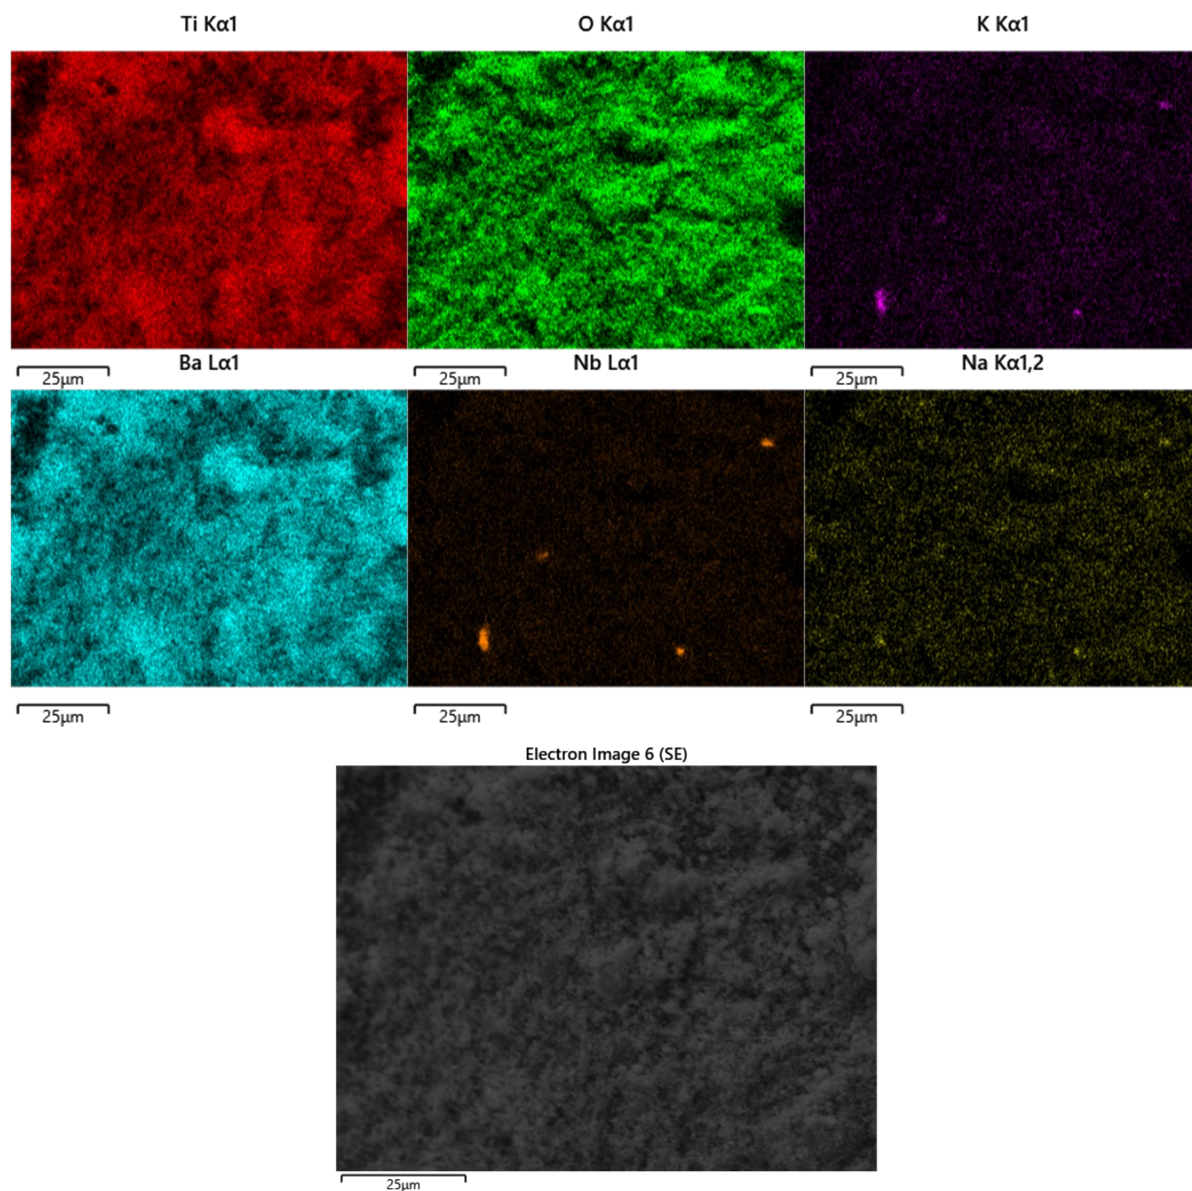

**Figure S1** Elemental mapping of 1% KNN-BT ceramics using EDS

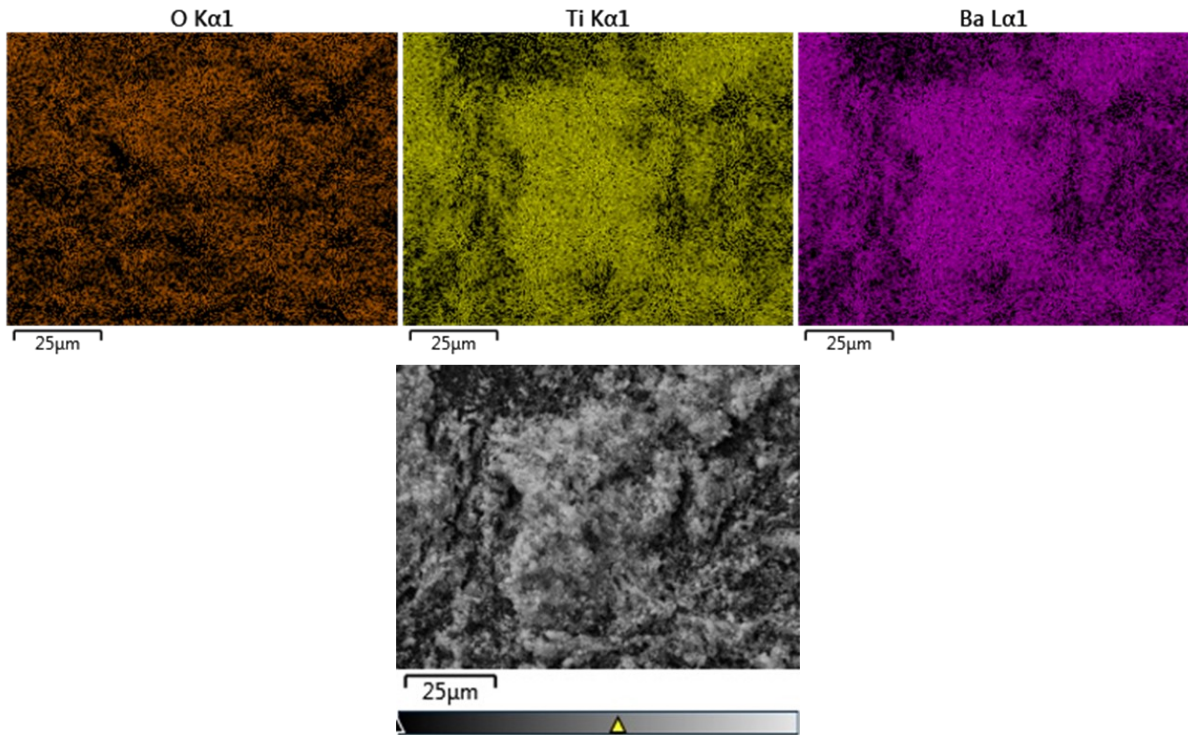

Figure S2 Elemental mapping of BaTiO<sub>3</sub> ceramics using EDS

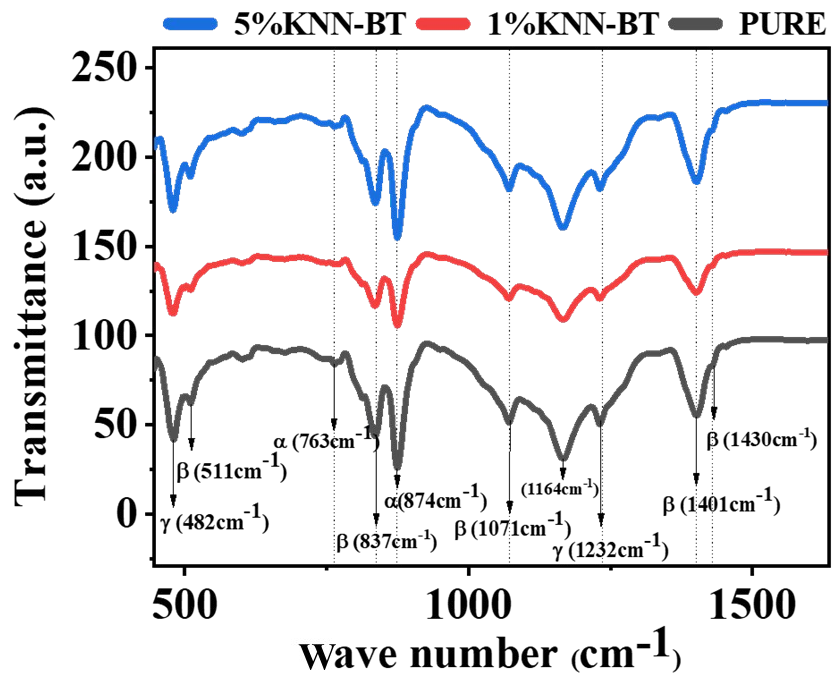

Figure S3 FT-IR analysis of pristine PVDF, 1% (1% KNN-BT)/PVDF composite, and 5% (1% KNN-BT)/PVDF

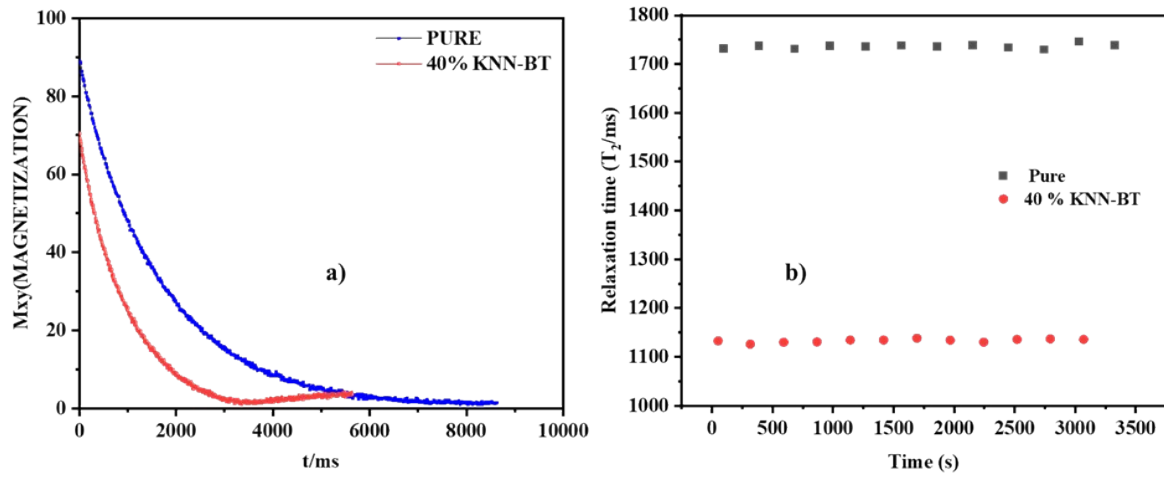

**Figure S4** Stability analysis of the 40%(1%KNN)-BT/PVDF composite and pristine PVDF

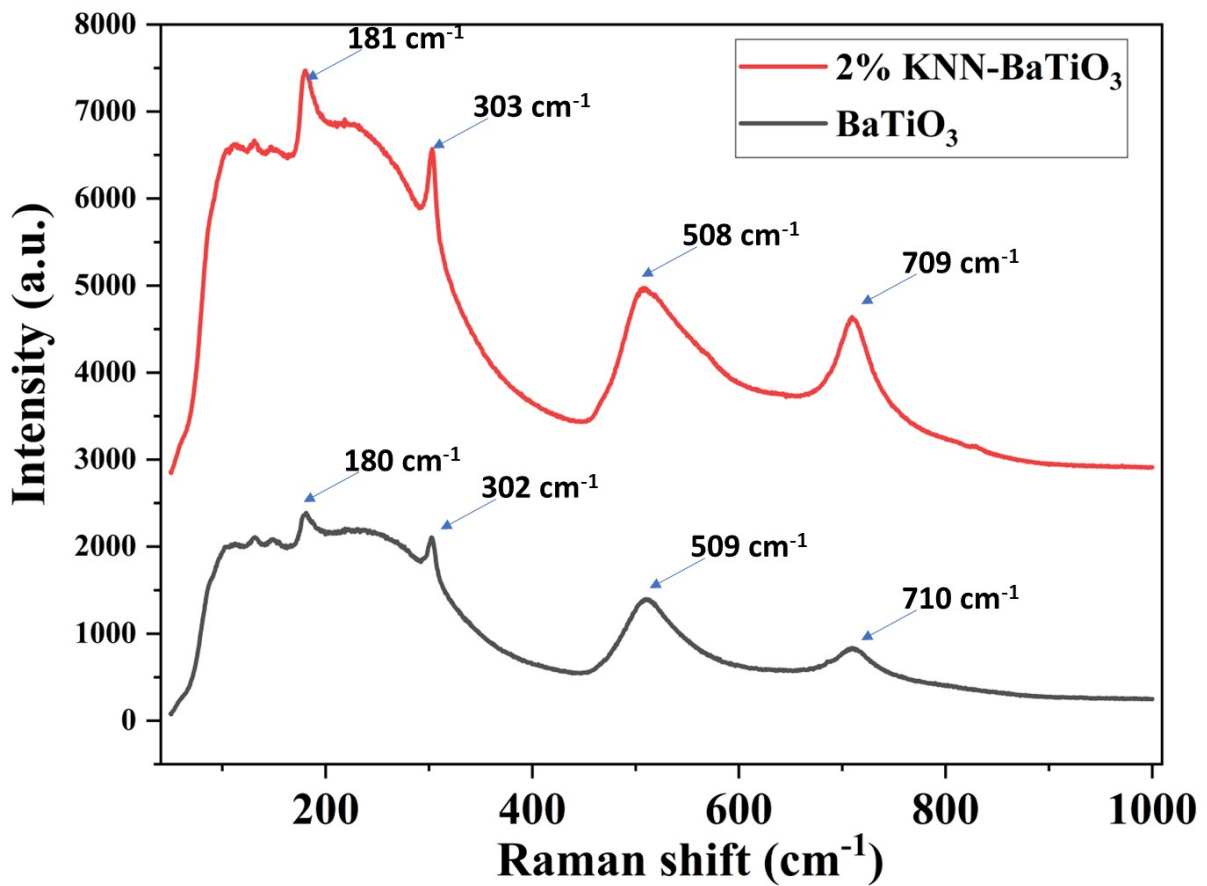

**Figure S5** Raman spectra of pristine BaTiO<sub>3</sub> and 2 wt% KNN-BaTiO<sub>3</sub> samples

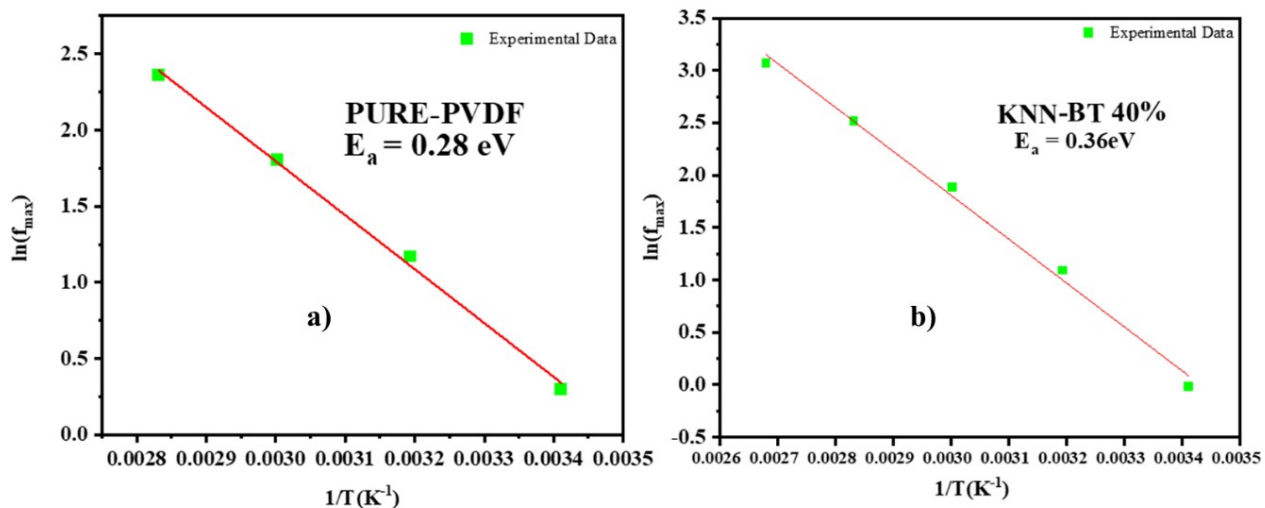

Figure S6 Activation energy plot of a) PVDF and b) 40% (1%KNN)-BT/PVDF composite

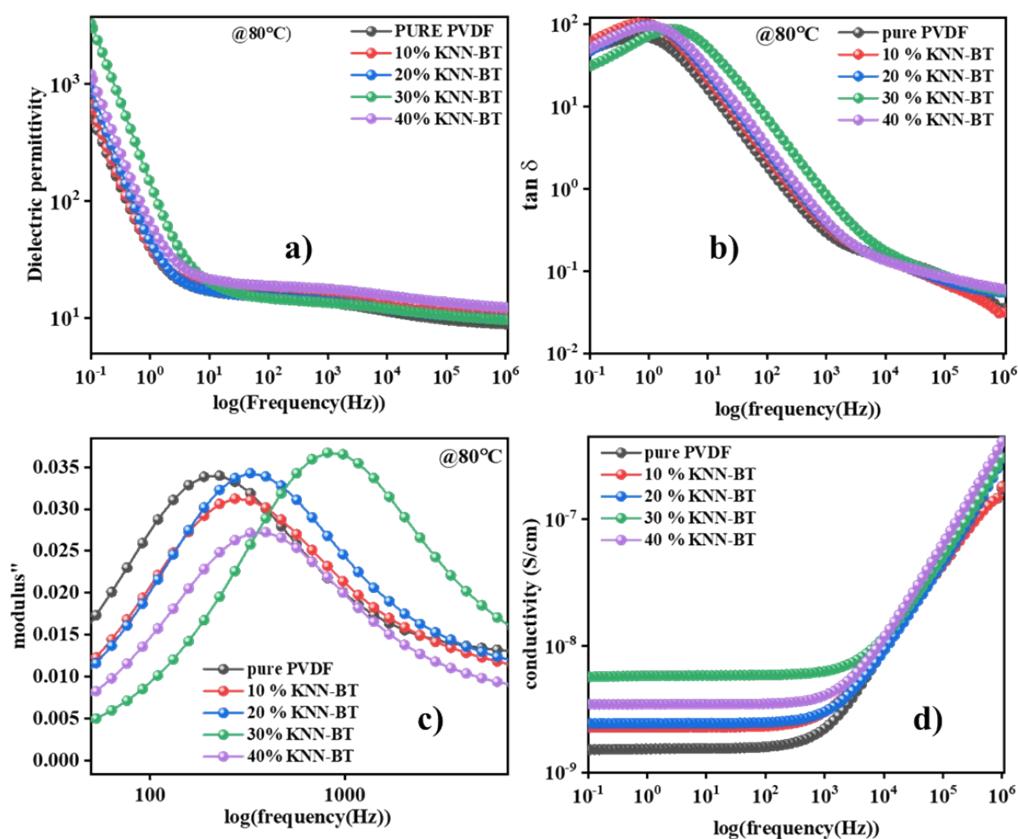

**Figure S7** The dielectric properties comparison for all prepared flexible composites with pristine PVDF at 80 °C, a) dielectric permittivity, b) dielectric loss tangent, c) imaginary electric modulus, d) conductivity

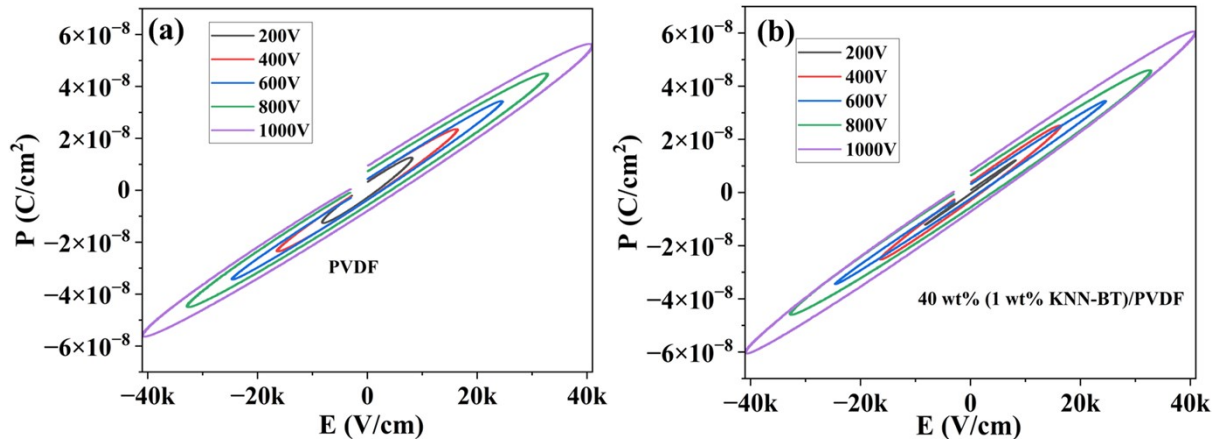

**Figure S8** The P-E loop measurements for the (a) pure PVDF film, and (b) 40 wt% (1 wt% KNN-BT/PVDF) composite film as a function of applied voltage

Note: The dimensions of the prepared sensing devices and samples for dielectric measurements are: circular discs of 20 mm, with electroding on both sides, with conducting tape

Table S1: The dielectric properties of KNN-BaTiO<sub>3</sub> composite ceramics measured at room temperature and ~1 Hz

| Sr. No. | Sample                         | $\epsilon'$ | $\sigma$ (S/cm)        | $\text{Tan}\delta$ |
|---------|--------------------------------|-------------|------------------------|--------------------|
| 1       | BaTiO <sub>3</sub>             | 202.6       | $8.9 \times 10^{-11}$  | 0.79               |
| 2       | 0.5 wt% KNN-BaTiO <sub>3</sub> | 196.8       | $4.0 \times 10^{-11}$  | 0.36               |
| 3       | 1 wt% KNN-BaTiO <sub>3</sub>   | 264.0       | $10.6 \times 10^{-11}$ | 0.72               |
| 4       | 2 wt% KNN-BaTiO <sub>3</sub>   | 199.4       | $4.93 \times 10^{-11}$ | 0.44               |

Table S2: The dielectric properties of (1% KNN-BaTiO<sub>3</sub>)/PVDF flexible composites  
measured at room temperature and ~1 Hz

| Sr. No. | Sample                                    | $\epsilon'$ | $\sigma$ (S/cm)        | Tan $\delta$ |
|---------|-------------------------------------------|-------------|------------------------|--------------|
| 1       | PVDF                                      | 15.1        | $1.33 \times 10^{-11}$ | 1.58         |
| 2       | 10% (1% KNN-<br>BaTiO <sub>3</sub> )/PVDF | 17.1        | $1.87 \times 10^{-11}$ | 1.96         |
| 3       | 20% (1% KNN-<br>BaTiO <sub>3</sub> )/PVDF | 18.5        | $1.91 \times 10^{-11}$ | 1.86         |
| 4       | 30% (1% KNN-<br>BaTiO <sub>3</sub> )/PVDF | 20.6        | $4.83 \times 10^{-11}$ | 4.21         |
| 5       | 40% (1% KNN-<br>BaTiO <sub>3</sub> )/PVDF | 21.36       | $0.78 \times 10^{-11}$ | 0.66         |
| 6       | 50% (1% KNN-<br>BaTiO <sub>3</sub> )/PVDF | 20.9        | $1.9 \times 10^{-11}$  | 1.63         |

Table S3: The dielectric properties of (1% KNN-BaTiO<sub>3</sub>)/PVDF flexible composites  
measured at room temperature and ~1 kHz

| Sr. No. | Sample                                    | $\epsilon'$ | $\sigma$ (nS/cm) | Tan $\delta$ | Ref       |
|---------|-------------------------------------------|-------------|------------------|--------------|-----------|
| 1       | PVDF                                      | 9.56        | 0.57             | 0.09         | This work |
| 2       | 10% (1% KNN-<br>BaTiO <sub>3</sub> )/PVDF | 11.50       | 0.62             | 0.08         | This work |
| 3       | 20% (1% KNN-<br>BaTiO <sub>3</sub> )/PVDF | 12.50       | 0.73             | 0.09         | This work |
| 4       | 30% (1% KNN-<br>BaTiO <sub>3</sub> )/PVDF | 14.24       | 0.97             | 0.10         | This work |

|   |                          |       |      |      |           |
|---|--------------------------|-------|------|------|-----------|
|   | BaTiO <sub>3</sub> /PVDF |       |      |      |           |
| 5 | 40% (1% KNN-             | 15.20 | 0.87 | 0.09 | This work |
|   | BaTiO <sub>3</sub> /PVDF |       |      |      |           |
| 6 | 50% (1% KNN-             | 15.00 | 1.00 | 0.10 | This work |
|   | BaTiO <sub>3</sub> /PVDF |       |      |      |           |

Table S4: The dielectric properties of PVDF-based flexible composites measured at room temperature and ~1 kHz from literature [1][2]

| Sr. No. | Sample                                                      | $\epsilon$ | $\text{Tan}\delta$ | Ref              |
|---------|-------------------------------------------------------------|------------|--------------------|------------------|
| 1       | BaTiO <sub>3</sub> /PVDF                                    | 24         | 0.02               | [3]              |
| 2       | BaSnF <sub>4</sub> /PVDF                                    | 20.5       | 0.095              | [4]              |
| 3       | Ba <sub>0.6</sub> Sr <sub>0.4</sub> TiO <sub>3</sub> /PVDF  | 20.56      | 0.02               | [5]              |
| 4       | SrTiO <sub>3</sub> @SiO <sub>2</sub> /PVDF-                 | 12.8       | 0.025              | [6]              |
|         | CTFE                                                        |            |                    |                  |
| 5       | NaNbO <sub>3</sub> /PVDF                                    | 15.3       | 0.03               | [7]              |
| 6       | Ba <sub>0.7</sub> Sr <sub>0.3</sub> TiO <sub>3</sub> /PVDF- | 14         | 0.04               | [8]              |
|         | HFP                                                         |            |                    |                  |
| 7       | PVDF/BaTiO <sub>3</sub> /RGO                                | 12         | 0.88               | [9]              |
| 8       | PVDF/BaTiO <sub>3</sub> hollow                              | 10         | 0.90               | [10]             |
|         | nanospheres                                                 |            |                    |                  |
| 9       | KNN-BT/PVDF                                                 | 15.20      | 0.09               | <b>This work</b> |

Table S5: The capacitive pressure-sensing properties of the composites measured at room temperature from the literature

| Sr. No. | Sample                                                         | Sensitivity             | Ref              |
|---------|----------------------------------------------------------------|-------------------------|------------------|
| 1       | PDMS-<br>PEDOT:PSS/MXene<br>-PVDF-TrFF                         | 0.51 kPa <sup>-1</sup>  | [11]             |
| 2       | Polyurethane-PVDF                                              | 0.3 kPa <sup>-1</sup>   | [12]             |
| 3       | KNN-BT/PVDF                                                    | 0.297 kPa <sup>-1</sup> | <b>This work</b> |
| 4       | micropillar-PVDF                                               | 0.430 kPa <sup>-1</sup> | [13]             |
| 5       | (PVDF-TrFE) fiber-<br>TiO <sub>2</sub> pillar TiO <sub>2</sub> | 0.163 kPa <sup>-1</sup> | [14]             |
| 6       | Nanpillars-PVDF-<br>TrFE                                       | 0.35 kPa <sup>-1</sup>  | [15]             |

Table S6: The approximate average thickness of the prepared composite films

| Sr. No. | Sample                                | Thickness (std. dev.: 0.01 mm) |
|---------|---------------------------------------|--------------------------------|
| 1       | PVDF                                  | 0.16 mm                        |
| 2       | 10% (1% KNN-BaTiO <sub>3</sub> )/PVDF | 0.20 mm                        |
| 3       | 20% (1% KNN-BaTiO <sub>3</sub> )/PVDF | 0.20 mm                        |
| 4       | 30% (1% KNN-BaTiO <sub>3</sub> )/PVDF | 0.21 mm                        |
| 5       | 40% (1% KNN-BaTiO <sub>3</sub> )/PVDF | 0.22 mm                        |
| 6       | 50% (1% KNN-BaTiO <sub>3</sub> )/PVDF | 0.19 mm                        |

## References

- [1] J. Zhou, D. Hou, S. Cheng, J. Zhang, W. Chen, L. Zhou, P. Zhang, Recent advances in dispersion and alignment of fillers in PVDF-based composites for high-performance

- dielectric energy storage, *Mater. Today Energy*. 31 (2023) 101208.  
<https://doi.org/10.1016/j.mtener.2022.101208>.
- [2] E.C. Silva, J.P. da Silva, F.X. Nobre, L. Aguilera, M.R. Morelli, A.P. Luz, Y. Leyet, Flexible PVDF/BaTiO<sub>3</sub> composites for electromechanical applications: Effect of BaTiO<sub>3</sub> content and phase evolution, *J. Alloys Compd.* 1051 (2026) 185954.  
<https://doi.org/10.1016/j.jallcom.2026.185954>.
- [3] T. Zhou, J.-W. Zha, R.-Y. Cui, B.-H. Fan, J.-K. Yuan, Z.-M. Dang, Improving Dielectric Properties of BaTiO<sub>3</sub> /Ferroelectric Polymer Composites by Employing Surface Hydroxylated BaTiO<sub>3</sub> Nanoparticles, *ACS Appl. Mater. Interfaces*. 3 (2011) 2184–2188. <https://doi.org/10.1021/am200492q>.
- [4] C.-Y. Cho, S.-H. Kim, J.-W. Ha, H.S. Kang, E.-H. Sohn, I.J. Park, G.-R. Yi, S.G. Lee, High Dielectric Constant and Low Percolation Threshold in Poly(vinylidene fluoride) Composite Films Containing Mechanochemically Synthesized BaSnF<sub>4</sub> Nanowires, *ACS Appl. Electron. Mater.* 1 (2019) 2355–2362.  
<https://doi.org/10.1021/acsaelm.9b00537>.
- [5] Z.B. Pan, L.M. Yao, J.W. Zhai, S.H. Liu, K. Yang, H.T. Wang, J.H. Liu, Fast discharge and high energy density of nanocomposite capacitors using Ba<sub>0.6</sub>Sr<sub>0.4</sub>TiO<sub>3</sub> nanofibers, *Ceram. Int.* 42 (2016) 14667–14674.  
<https://doi.org/10.1016/j.ceramint.2016.06.090>.
- [6] B. Xie, L. Zhang, M.A. Marwat, Y. Zhu, W. Ma, P. Fan, H. Zhang, High energy storage performance for dielectric film capacitors by designing 1D SrTiO<sub>3</sub>@SiO<sub>2</sub> nanofillers, *J. Adv. Dielectr.* 08 (2018) 1850039.  
<https://doi.org/10.1142/S2010135X1850039X>.
- [7] Z. Pan, L. Yao, G. Ge, B. Shen, J. Zhai, High-performance capacitors based on

- NaNbO<sub>3</sub> nanowires/poly(vinylidene fluoride) nanocomposites, *J. Mater. Chem. A*. 6 (2018) 14614–14622. <https://doi.org/10.1039/C8TA03084G>.
- [8] S. Wang, X. Huang, G. Wang, Y. Wang, J. He, P. Jiang, Increasing the Energy Efficiency and Breakdown Strength of High-Energy-Density Polymer Nanocomposites by Engineering the Ba<sub>0.7</sub>Sr<sub>0.3</sub>TiO<sub>3</sub> Nanowire Surface via Reversible Addition–Fragmentation Chain Transfer Polymerization, *J. Phys. Chem. C*. 119 (2015) 25307–25318. <https://doi.org/10.1021/acs.jpcc.5b09066>.
- [9] N.D. Kulkarni, P. Kumari, Role of rGO on mechanical, thermal, and piezoelectric behaviour of PVDF-BTO nanocomposites for energy harvesting applications, *J. Polym. Res.* 30 (2023) 79. <https://doi.org/10.1007/s10965-023-03449-4>.
- [10] S. Cho, J.S. Lee, J. Jang, Enhanced Crystallinity, Dielectric, and Energy Harvesting Performances of Surface-Treated Barium Titanate Hollow Nanospheres/PVDF Nanocomposites, *Adv. Mater. Interfaces*. 2 (2015). <https://doi.org/10.1002/admi.201500098>.
- [11] S. Sharma, A. Chhetry, M. Sharifuzzaman, H. Yoon, J.Y. Park, Wearable Capacitive Pressure Sensor Based on MXene Composite Nanofibrous Scaffolds for Reliable Human Physiological Signal Acquisition, *ACS Appl. Mater. Interfaces*. 12 (2020) 22212–22224. <https://doi.org/10.1021/acsami.0c05819>.
- [12] G. Kaur, J.S. Meena, M. Jassal, A.K. Agrawal, Hybrid Piezo-Capacitive Multimodal Sensors Based on Polyurethane–Poly(vinylidene fluoride) Nanofibers for Wearable E-Textiles, *ACS Appl. Electron. Mater.* 5 (2023) 3298–3308. <https://doi.org/10.1021/acsaelm.3c00346>.
- [13] Z. Luo, J. Chen, Z. Zhu, L. Li, Y. Su, W. Tang, O.M. Omisore, L. Wang, H. Li, High-Resolution and High-Sensitivity Flexible Capacitive Pressure Sensors Enhanced by a

- Transferable Electrode Array and a Micropillar–PVDF Film, *ACS Appl. Mater. Interfaces*. 13 (2021) 7635–7649. <https://doi.org/10.1021/acsami.0c23042>.
- [14] H. Niu, H. Li, Y. Li, W. Yue, S. Gao, X. Wei, G. Shen, Cocklebur-inspired “branch-seed-spininess” 3D hierarchical structure bionic electronic skin for intelligent perception, *Nano Energy*. 107 (2023) 108144. <https://doi.org/10.1016/j.nanoen.2022.108144>.
- [15] Y. Guo, S. Gao, W. Yue, C. Zhang, Y. Li, Anodized Aluminum Oxide-Assisted Low-Cost Flexible Capacitive Pressure Sensors Based on Double-Sided Nanopillars by a Facile Fabrication Method, *ACS Appl. Mater. Interfaces*. 11 (2019) 48594–48603. <https://doi.org/10.1021/acsami.9b17966>.
